# Supplementary material
Source: HighWire-hosted journal article supplement (https://bmjopenquality.bmj.com/content/5/1/u210274.w4363)

d

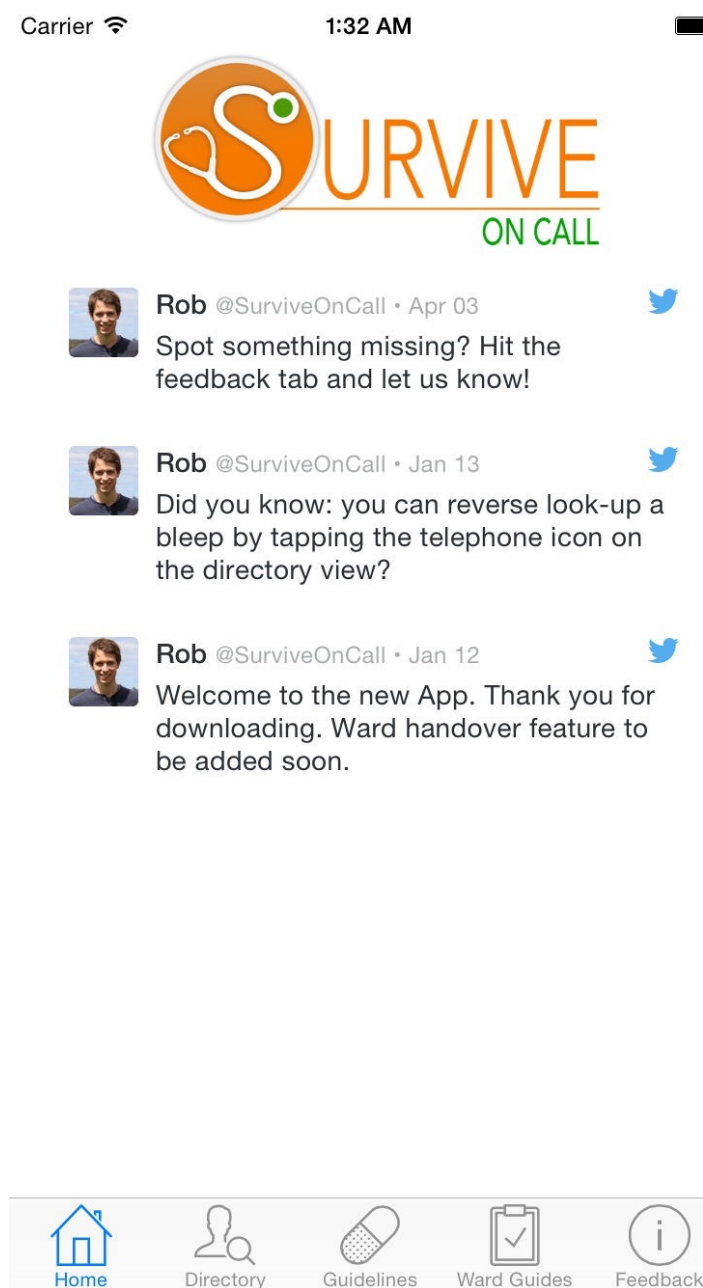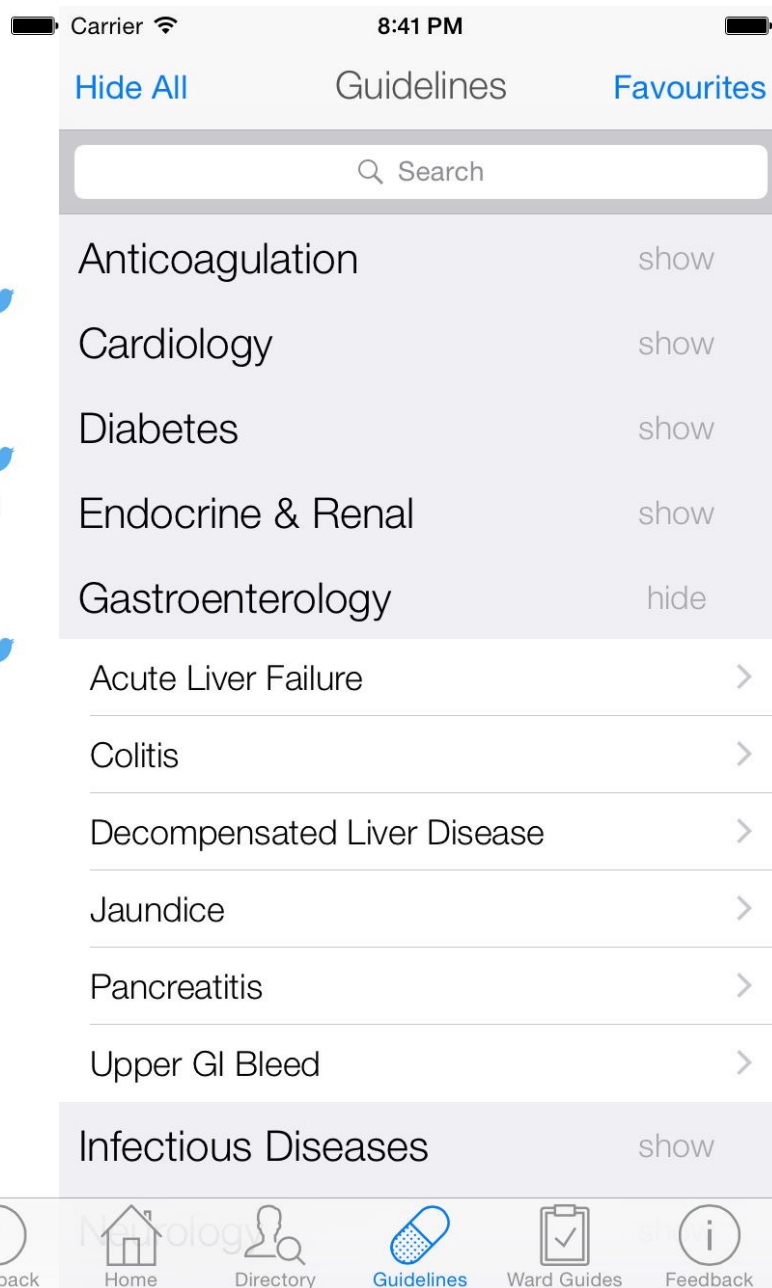

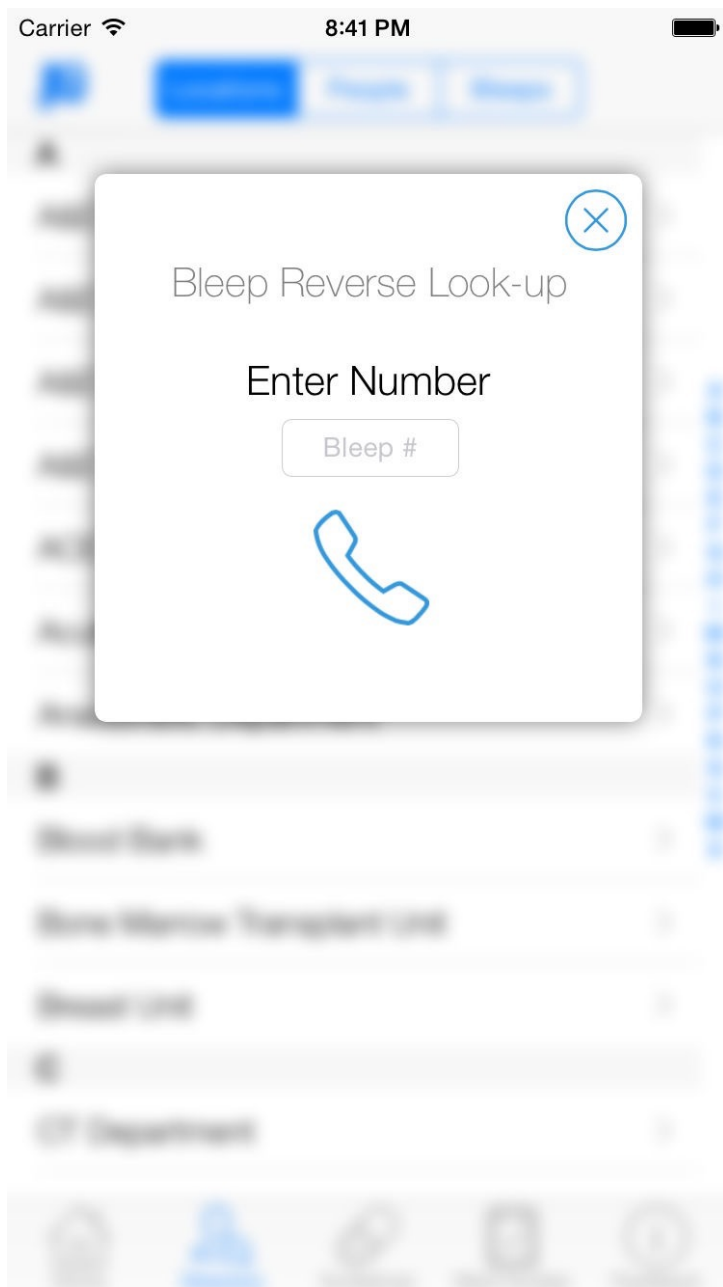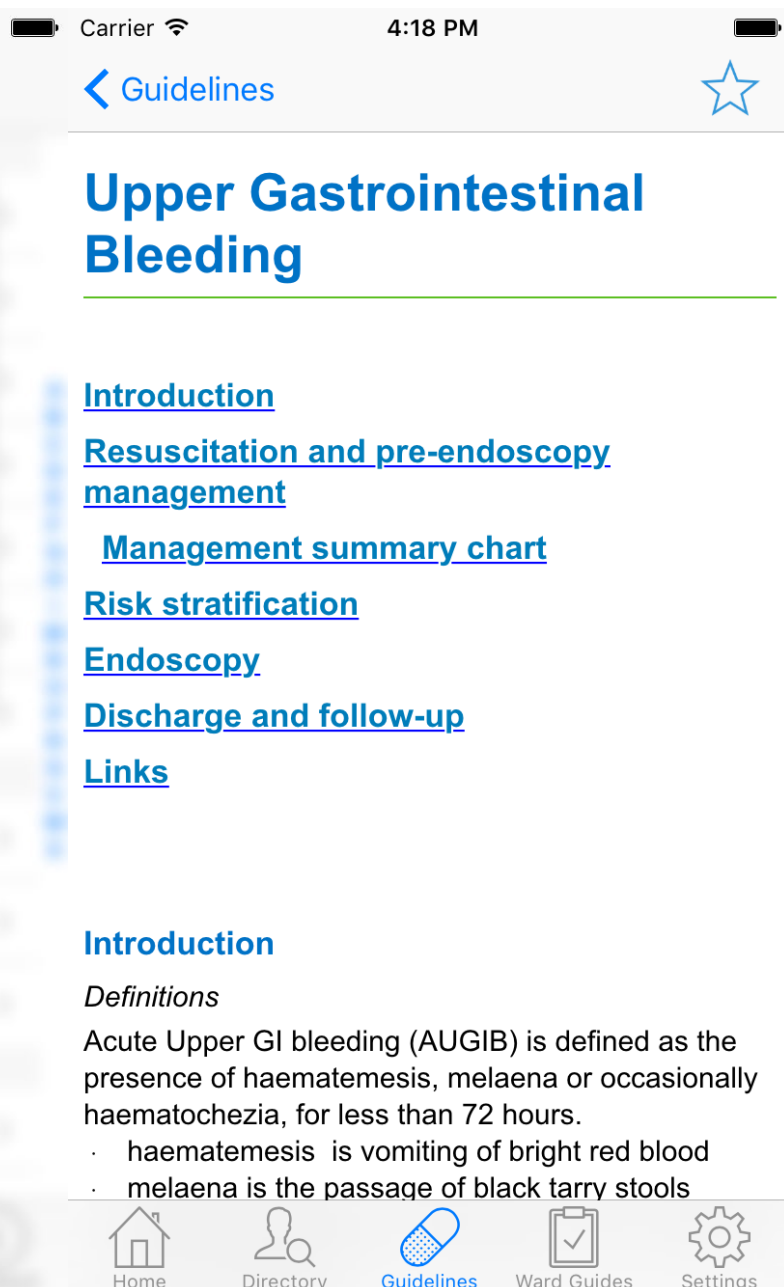

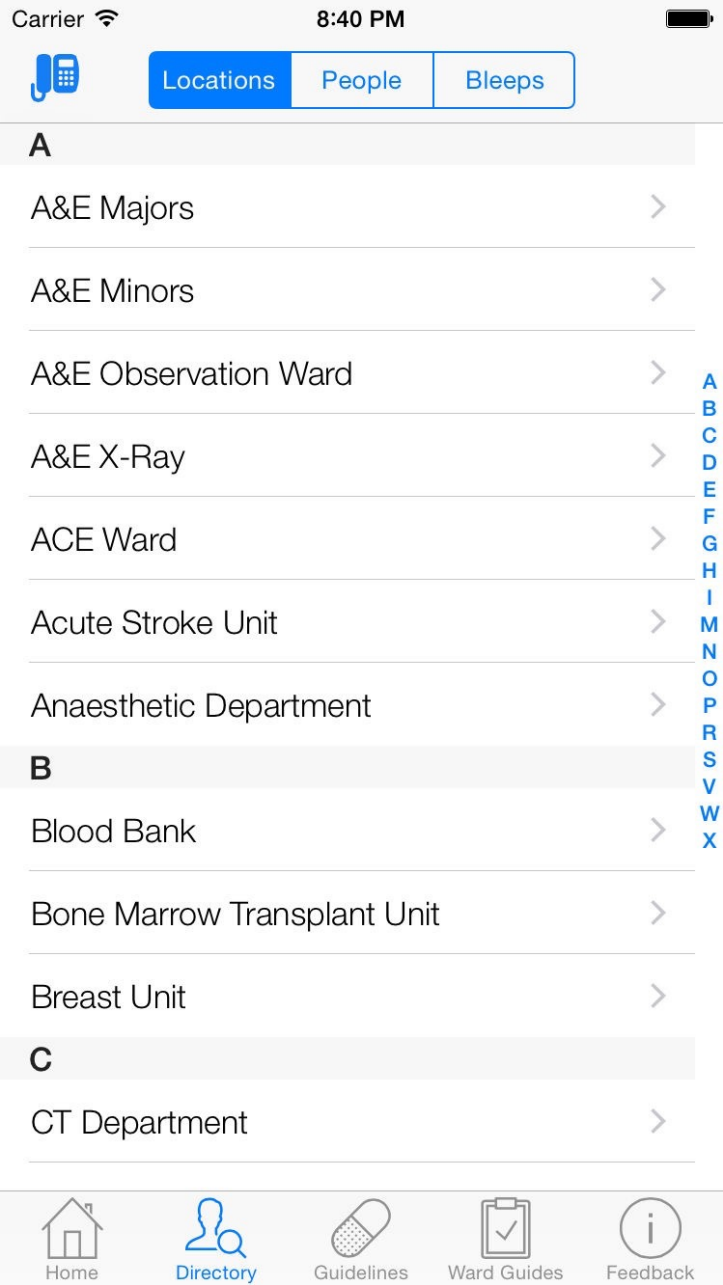

Supplement: inline-supplementary-material-1 [file inline-supplementary-material-1.pdf]
